# Supplementary material for: Comparative Phylogenomics of Pathogenic and Non-Pathogenic Mycobacterium
Source: PubMed Central journal article supplement (PMC3756022; doi:10.1371/journal.pone.0071248), 2013-08-28

# Multiple sequence alignment of all 9 exclusive genes of pathogens

## 1) Rv0234c – Succinate semialdehyde dehydrogenase

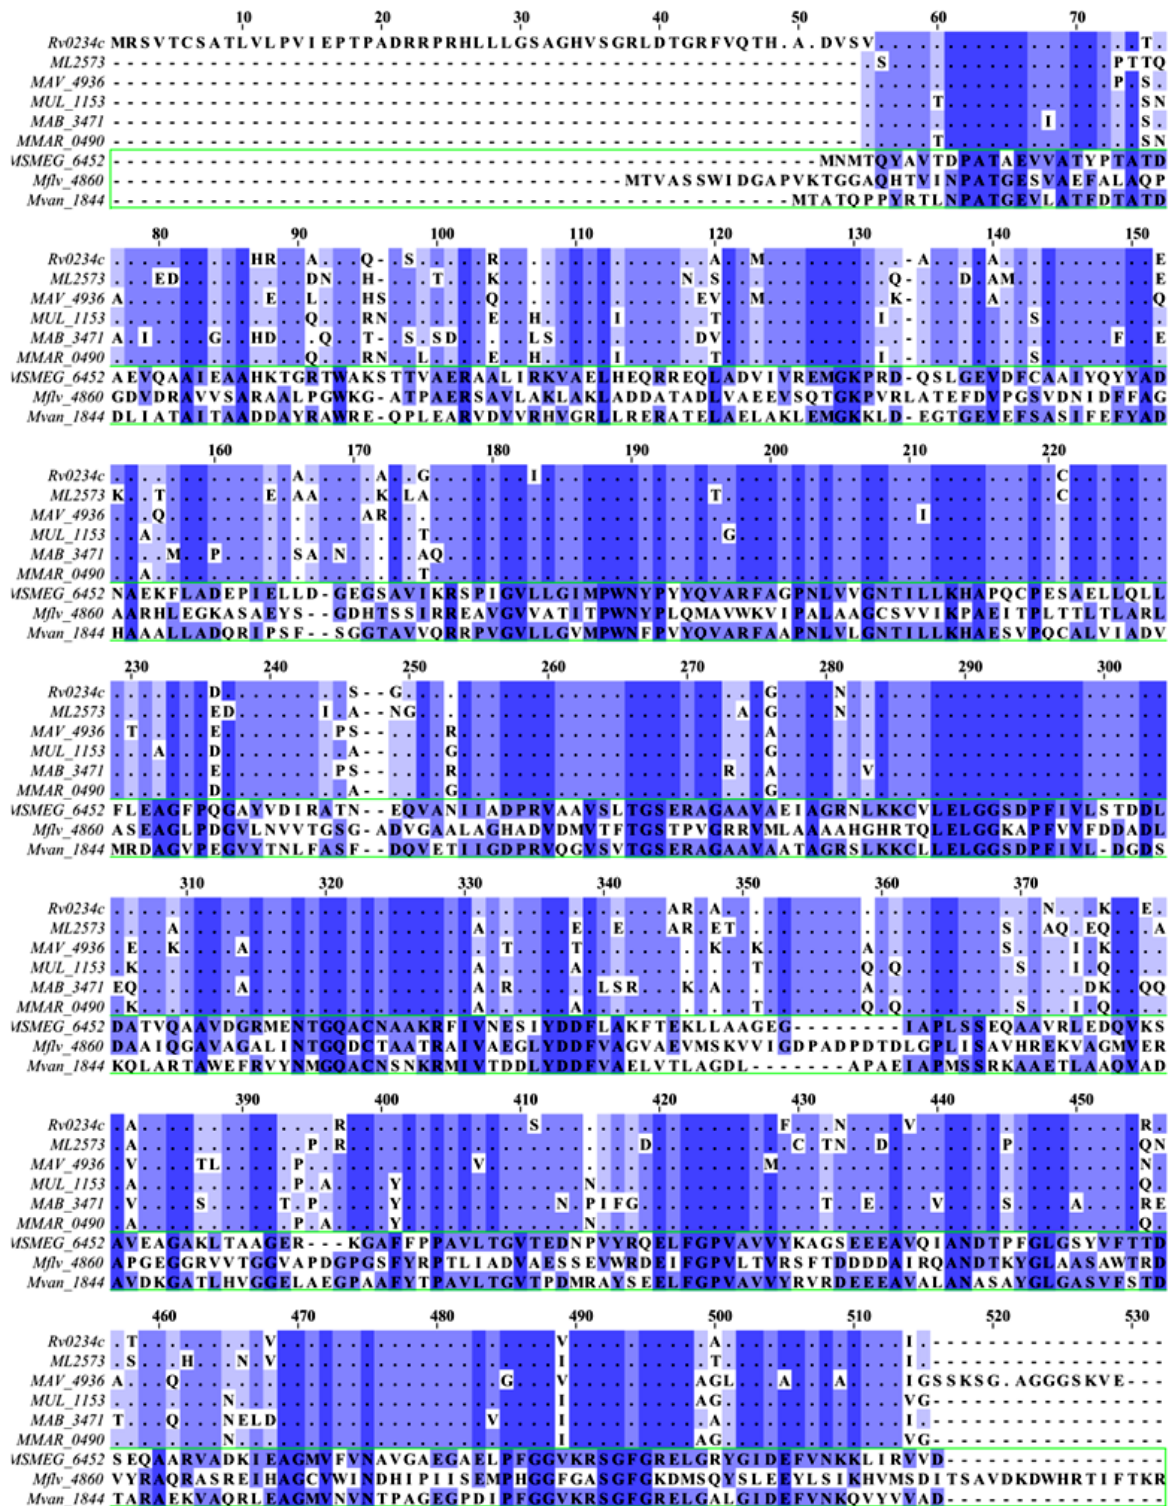

## 2) Rv0364 – Conserved membrane protein

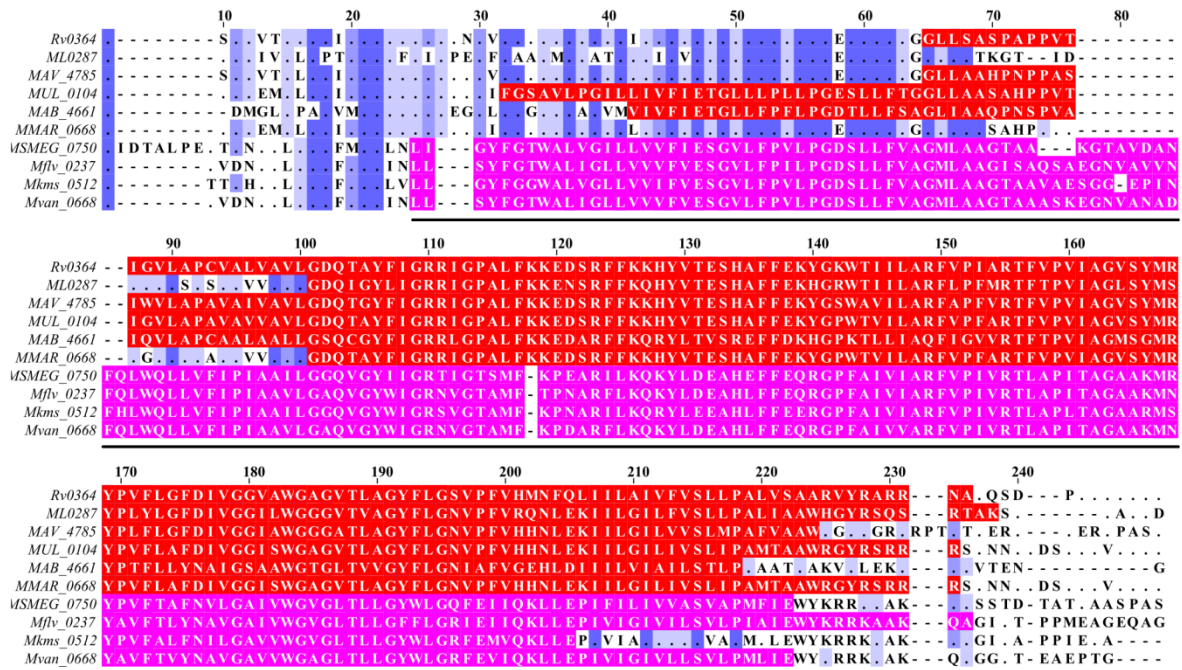

SNARE associated Superfamily

## 3) Rv0382c – Orotate phosphoribosyltransferase

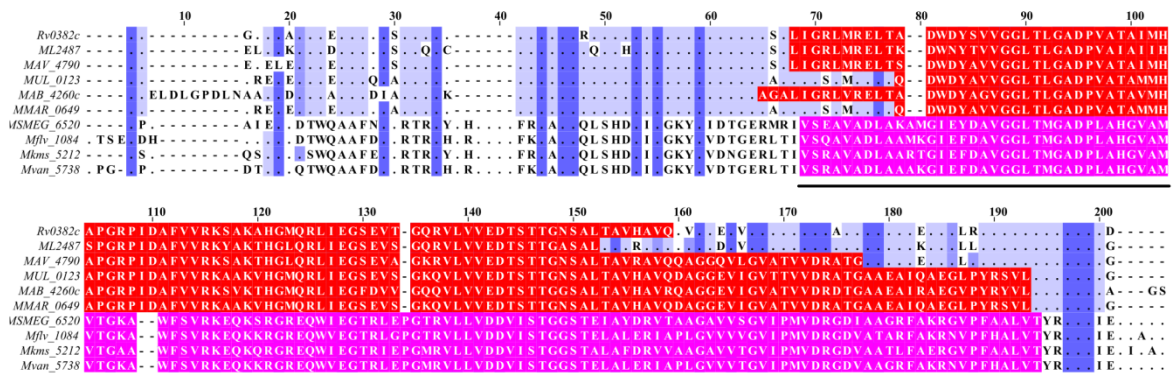

PRTases\_type 1

#### 4) Rv0451c – Membrane protein

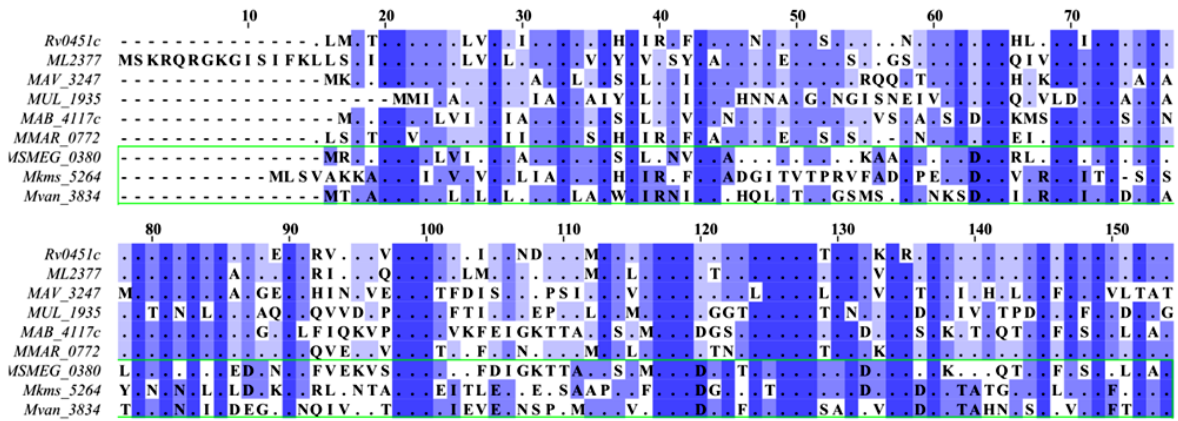

#### 5) Rv1404- Transcriptional regulator

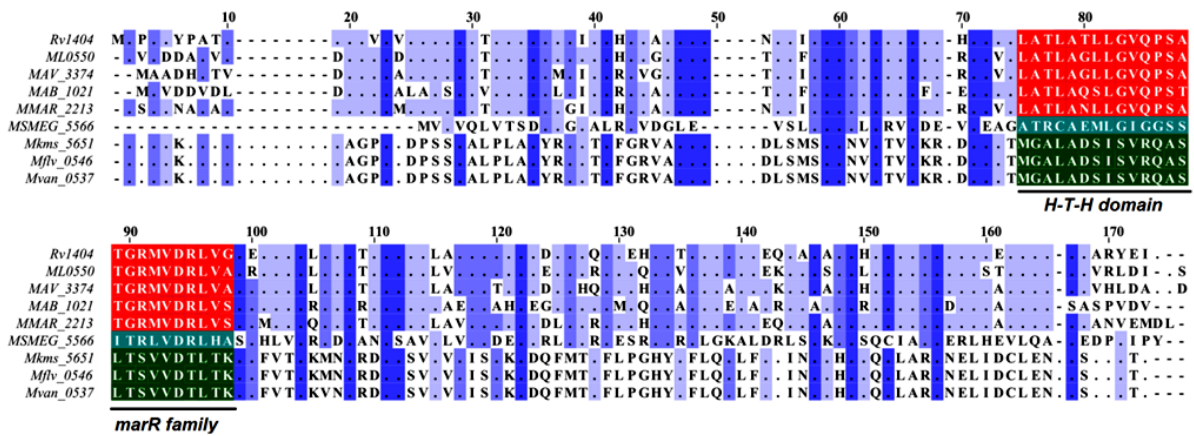

## 6) Rv1524- Glycosyl transferase

```

      10      20      30      40      50      60      70      80      90
Rv1524  - - - - - V V . . . I . . . L . . . D C L . . . V T . . S . . A S R S . Q . . - - -
ML2348  - - - - - T . A S S . . . F . L L . . . I G . . . D M L R V . . A . . A . . . F . A R . .
MAV_3258 - - - - - R . . . . I S . . . L . . . D L . . . E V . V . T A . . . N V . F . A R . .
MUL_1529 - - - - - S . . . . N R A L H S . G N Y R A E A T K D A S Q Y . . . T V A A A . E . . C . . D L . .
MAB_4112c MA E N I D V H S V A H S D I G E V Y T V . . . M . . . . I . A V . . . M . . . D . . A G V . S . . I - H V G P Q . . Y R D L W
MSMEG_0385 - - - - - I N . . . . L . . . S . . . V . . . T L A A A . E . . . . . D L . .
Mkms_3175 - - - - - M K F V V A V H G T R G D V E P S V A V G R E L Q R R G H E V C V A V P P G L V A F A E T A G L D A - V A Y G P - E L D N F L - R D - - -
      100      110      120      130      140      150      160      170      180
Rv1524  - Q . . . . H N A . . . . . M A . V T E G . . E L . A M . T P V . A . . . . Q . . . E V V . . . H H . . . . Y V A . . E I A F . A R . .
ML2348  - T Y S Q W . Q W . . . I L P . . A . Q Q . . . L R Q . . D . A T D . S . . . . V M . V V . G V V . . . . F G V . . V A V . . I . . S . .
MAV_3258 - E . . . . N M . R D F F R . . R . V L K V W D . I I K Y . E A . A . S V E . . . . S . L N F E Q A . . . . D . . S . H . M A . A . S Q V . N - M .
MUL_1529 - N . . . . Q E . . . . P . T S . . V . G I S D L R Q . S D . A G . . T . . . . V . . M . H . G I . L A . . . . T M . L S V . S R V . I - S
MAB_4112c T S W . . T . H . R . . . D L V A . C . Q . K L V T E Q . S E . E . V S V E . . . . S . S V G . E E P . . F . . . V . T M . W . P . Q . F . V .
MMAR_2353 - N . . . . Q E . . . . P . T S . . V . G I S D L R Q . S D . A G . . T . . . . V . . M . H . G I . L A . . . . T M . L S V . S R V . I - S
MSMEG_0385 - D F . . . L R N F W M Q M I R N P V G S L R E L W A P I T R Y W N D T S K V I T T L A D G A D L L S T G I N F E Q A A A N Y A E H Y D I P F V S L H H F M R P N G K L V - P A - L F
Mkms_3175 - D I . . . F R E W Y R . . L R N P M T V L R E A R E Y V V E G W A E M S R S D A L A D G A D L I L I G T T Y Q E L A A N Y A A A H A I P L A A L H Y F P Y R P S T K S L - R V P V P
      190      200      210      220      230      240      250      260      270
Rv1524  A . . . . T . T . I D . Y . M . G V . . . . . T . A P . . M A V . . . . . A L . . . . . G . . . . . M . S A . D . . . A
ML2348  S . . . . A I L A T V W R A . L L A . K P . . . . . T . L . T . . V . . A . . . . . L . . . . . L . . . . . A . N . .
MAV_3258 S . . . . T M T . I E . F . S . K V D N . Q . . . . T R R . Q . . A E . W . . . . . V . . . . . H . . . . . M . . . . . S . D . A
MUL_1529 P R . N . . S . L W . V . . . . N P . E . . . . M A . . . . S . T S . L . G R . . . . . L . . . . . L . M . . . . S . N . .
MAB_4112c P M . T . T G M T . Y D . T . . . . G A . . . . H . . . . Q . T . . P Q . G Q . N . . . . A V . R . . E . . K Y . G . . . . M . T . S . . M
MMAR_2353 P R . N . . S . L W . V . . . . N P . E . . . . M A . . . . S . T S . L . G R . . . . . L . . . . . L . M . . . . S . N . .
MSMEG_0385 A S V V R S V G A L S E W L F W R S T K E V E D A Q R R E L G L P R T K V P S P R R I A E R G S L E I Q A Y D A V S V P G L A D E W A D Q N R O R P F T G A L T M S L S T E A D D V T
Mkms_3175 S A V V G P V W A V G E A H W R V L R Q A E D F O R R E L G L P A S T R A V R R M L D D D G A L E I Q A Y D R V F F P G L A E F W - - - G P O R P L V G G I L L E K N T D A D D V V
      280      290      300      310      320      330      340      350      360
Rv1524  . . . . A D . . . . . I G . L . D R . . . . . S . P S . A T . I . Q . . . . V . R V . S . . . . T . . . . . G . . . .
ML2348  . . . . A . . . . . I V . T D . . . . . A . . . . . S V K P K . T Q . K . . . . I T S . S . . . . S . . . .
MAV_3258 . . . . A . . . . . C . S . I . L . T . E . G . S . R . . . . F . G . V R . R . . . . V . P . N Y . S . . . . S . . . .
MUL_1529 . . . . S . . . . . S . . . . . I . I . . . . . T . S N . G . L Q A P E N . . . . . S G . S . . . . C . . . . . G M . . . .
MAB_4112c . . . . S . P . . C . A S . I . . . . E . E . G S . . . . . V . A . A . F S . Q T S P . . . . V . N Y . . . . V S . I . . . . S . . . .
MMAR_2353 . . . . S . . . . . S . . . . . I . . . . . T . S N . G . L Q A P E N . . . . . S G . S . . . . C . . . . . G M . . . .
MSMEG_0385 S W I T S G E P F I C A T G S I P V Q S P T A T I E M I S H A C D Q L G Q R A L V C A G G T L R G V P Q F D N Y K M V G A V N Y A A V F P L C R G I V H H G S G T T A A S L R A G
Mkms_3175 S W T A A G T P F V Y E G F G S M P Y K S P A D A V A M I E A A C A D L G E R A L I C S G V W R V D E L P H A A H V K I N R S V N H A A V F L C R A V V H H G G A G T T A A G V R A G
      370      380      390      400      410      420      430      440      450
Rv1524  I . . . . V T S D . . . . . A . . . . . Q . . . . . R . . . . . A . K . . . . I A . . . . . A . . . . . V T . . . . I . S . . . . A . . . . A T . . . .
ML2348  V . . . . F I E . V A . . . . . A . . . . . A . . . . . Q R . . . . A A . . . . . A . Q . A T . . . . V . N . S . D . . . . N A . . . . . K . S . N K S R T R Y Q D C
MAV_3258 I . . . . A . . . . . S S A D . Y . A . . . . . T A . . . . . A . S . T . A A . . . . . A . A T . . . . D L A . . . . I E T T . . . . E . . . . K T L G . . . .
MUL_1529 I . . . . . W I E . . . . . L . . . . . I . S . . . . L A . . . . K . T . S . . . . C . G . . . . V A . P P G L R R C . . . . . S . . . .
MAB_4112c V . . . . . T V G D . F . G N . L R . M G . A S . . . . T . R D . . S . . . . C . G . . . . T E C A A . . . . A I . P H . S . H D . . . . S K . . . . . A K . S H P . . . .
MMAR_2353 I . . . . . W I E . . . . . L . . . . . I . S . . . . L A . . . . K . T . S . . . . C . G . . . . V A . . . . T I . N E . S . G . . . . A . R . . . . N E V S V S
MSMEG_0385 V P T I I L W S T A D Q P Y W G N Q L K R L K V G T S R R F S G A S R K S L V T D L R R I L R P E Y A V R A R E L A M R M T P A A E S V T I A A D L Y E N A V R Q A A M - - - -
Mkms_3175 V P T I I L W V G A E D F I W G S R V K R H L G V G D Y O R F S T T R K S L R R A L S R V L G R Y V E R A R E V A A A M T K P A S S V G T A A D L L E D A A R Q E R R H G O T I S P

```

## 7) Rv3484- Hypothetical protein cpsA

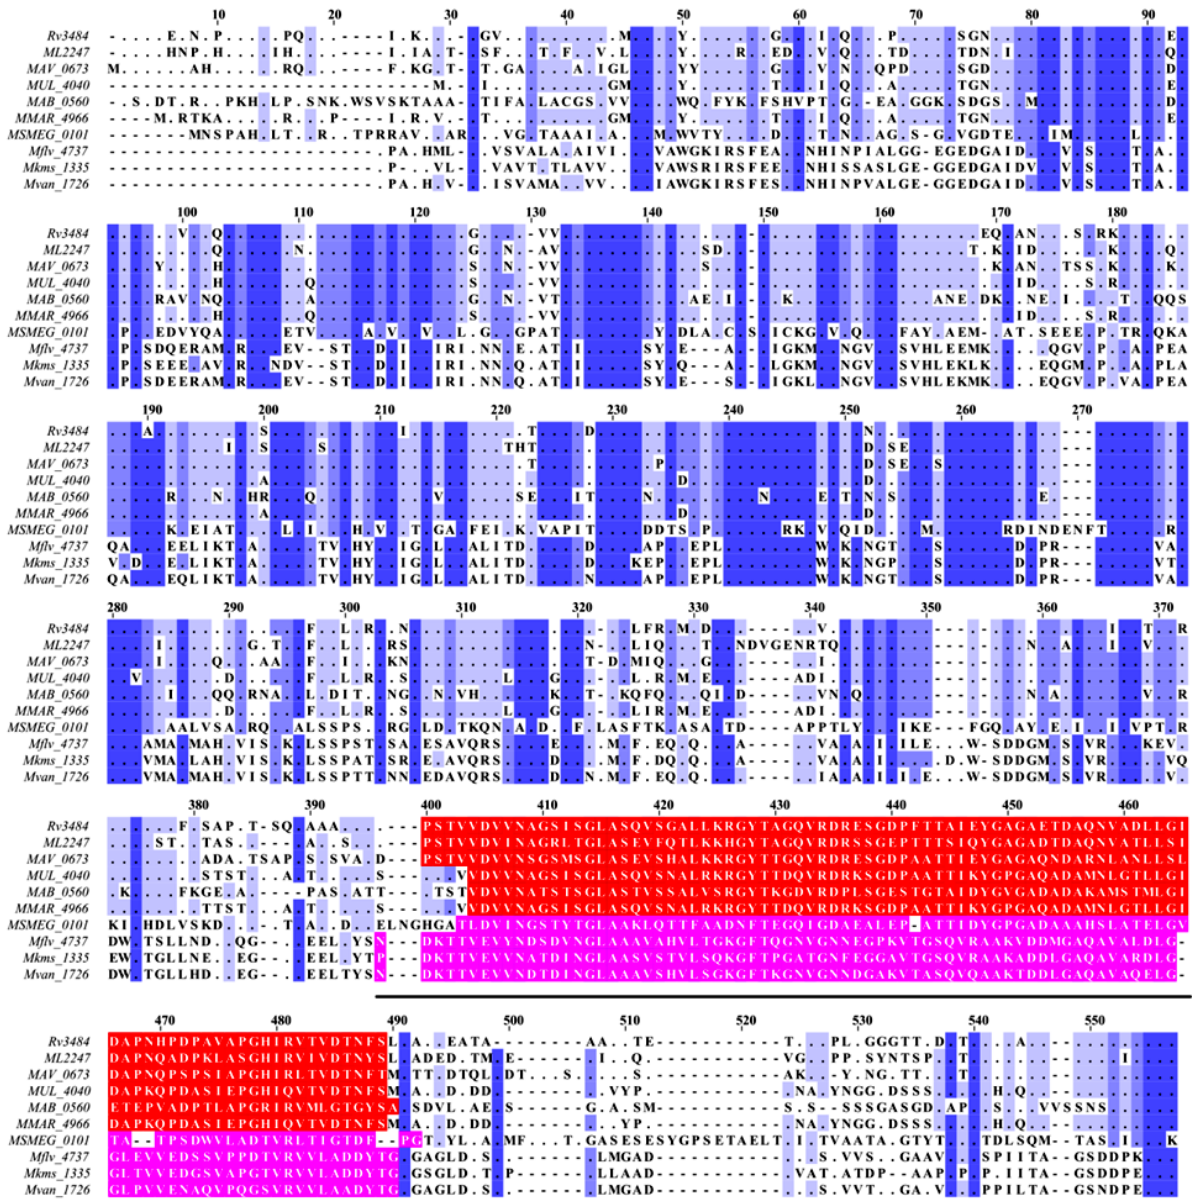

**LytR\_C superfamily**

## 8) Rv3631- Glycosyl transferase

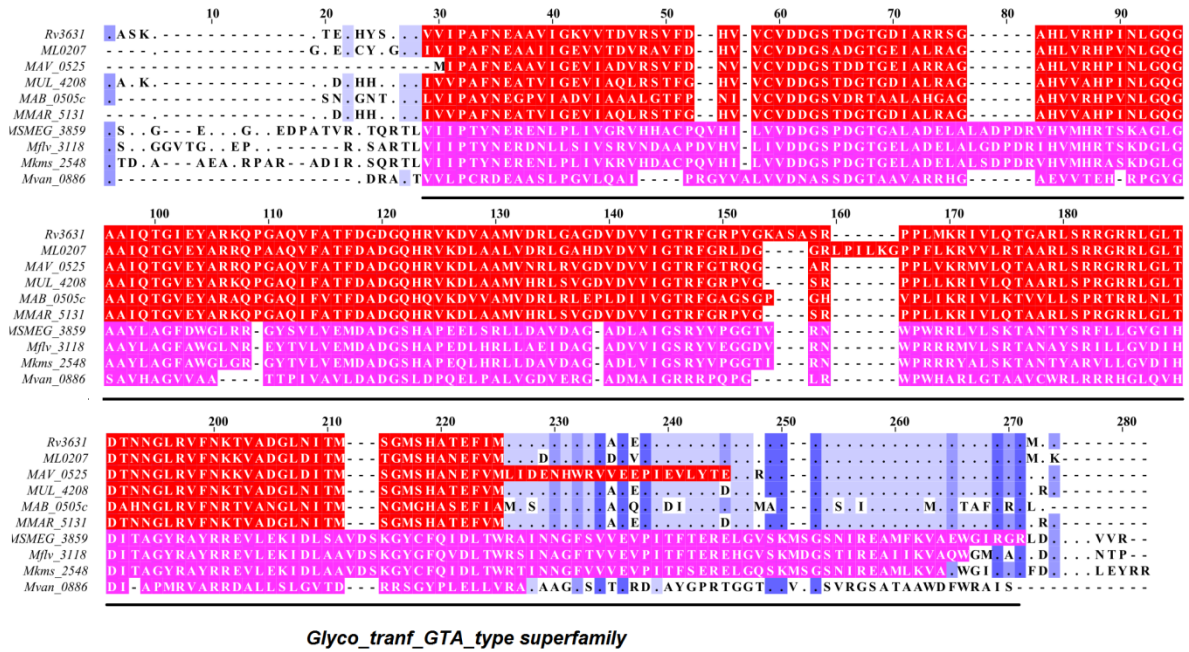

## 9) Rv3632- Conserved Membrane protein

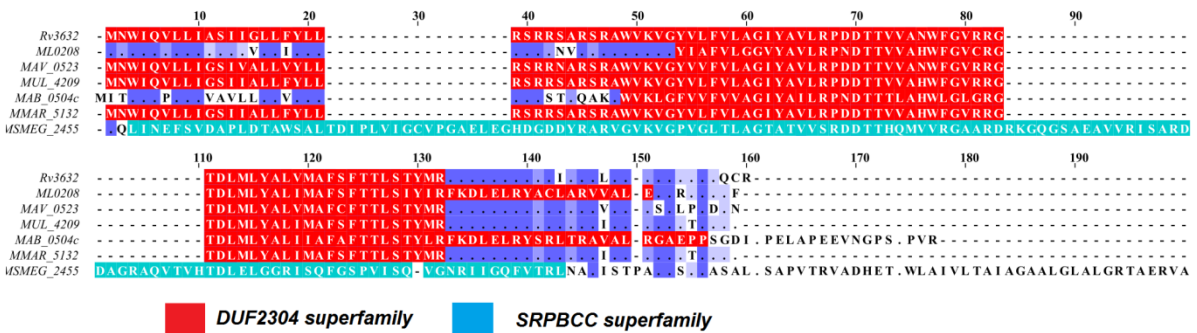

Supplement: pone.0071248.s006.pdf [file pone.0071248.s006.pdf]
