# Supplementary material for: Comparative Phylogenomics of Pathogenic and Non-Pathogenic Mycobacterium
Source: PubMed Central journal article supplement (PMC3756022; doi:10.1371/journal.pone.0071248), 2013-08-28
Supplement: pone.0071248.s005.pdf [file pone.0071248.s005.pdf]

**Table-S1:** BLAST hits for exclusive pathogenic genes in each of the non-pathogens considered in this study. The exclusive genes in *M. tuberculosis* H37Rv were used as reference for BLAST.

| GENE PRODUCT                         | MTB     | MSMEG | MGIL  | MKMS   | MVAN  |
|--------------------------------------|---------|-------|-------|--------|-------|
| succinate-semialdehyde dehydrogenase | Rv0234c | 6452  | 4860  | -      | 1844  |
|                                      |         | 46 88 | 36 90 | - -    | 43 89 |
| Conserved membrane protein           | Rv0364  | 0750  | 0237  | 0512   | 0688  |
|                                      |         | 42 96 | 41 92 | 42 96  | 44 92 |
| Orotate phosphoribosyltransferase    | Rv0382c | 6520  | 1084  | 5212   | 5738  |
|                                      |         | 38 65 | 31 86 | 34 86  | 32 86 |
| Membrane protein                     | Rv0451c | 0380  | -     | 5264   | 3834  |
|                                      |         | 60 99 | - -   | 50 97  | 51 99 |
| Transcriptional regulator            | Rv1404  | 5566  | 0546  | 5561   | 0537  |
|                                      |         | 32 75 | 25 76 | 25 76  | 25 76 |
| Glycosyl transferase                 | Rv1524  | 0385  | -     | 3175   | -     |
|                                      |         | 58 99 | - -   | 62 100 | - -   |
| Hypothetical protein cpsA            | Rv3484  | 0107  | 4737  | 1335   | 1726  |
|                                      |         | 41 84 | 38 77 | 41 77  | 36 86 |
| Glycosyl transferase                 | Rv3631  | 3859  | 3118  | 2548   | 0886  |
|                                      |         | 25 93 | 25 93 | 26 93  | 30 80 |
| Conserved membrane protein           | Rv3632  | 2455  | -     | -      | -     |
|                                      |         | 54 24 | - -   | - -    | - -   |

\* The numbers in white row indicate the loci for each organism. For example, the best homolog hit for Rv0234c in *M. smegmatis* was found to be MSMEG\_6452. Numbers in orange blocks indicate % identity, while the numbers in green blocks represent % coverage.
